# Supplementary material
Source: Springer Nature journal article supplement (https://www.springermedizin.de/resource/supplementary/13023_2012_395_MOESM10_ESM.pdf/9642260)

**A**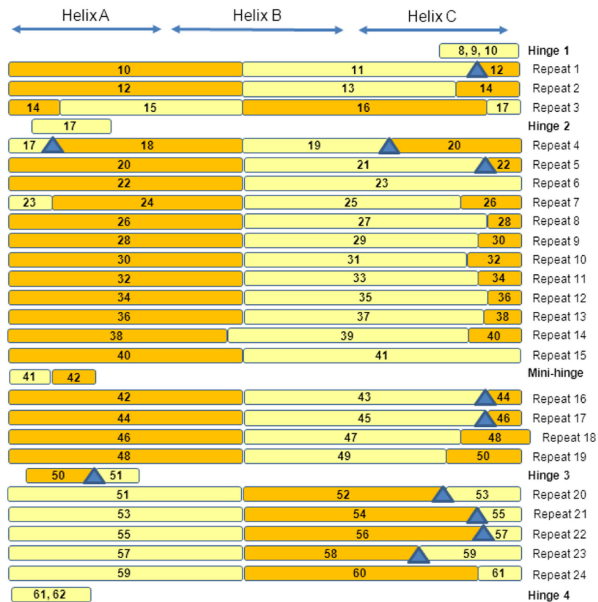**B**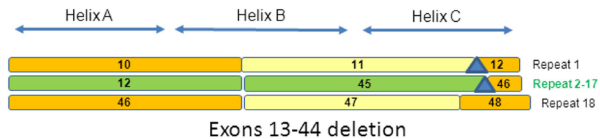**C**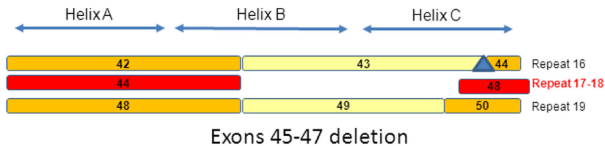**D**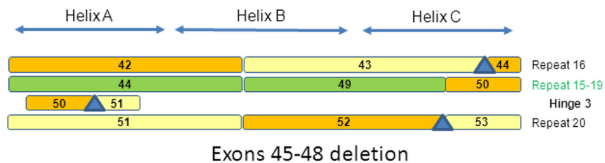

Supplement: MOESM10 [file 9642260]
